# Supplementary material for: Increased Corneal Toricity after Long-Term Orthokeratology Lens Wear
Source: Hindawi journal article supplement (doi:10.1155/2018/7106028), 2018-10-23
Supplement: f1 [file 7106028.f1.pdf]

| BL Sph (D) | BL Cyl (D) | BL Age (y) | LW Time (m) | Final Sph (D) | Final Cyl (D) | BL FK (D) | Final FK (D) | BL SK (D) | Final SK (D) |
|------------|------------|------------|-------------|---------------|---------------|-----------|--------------|-----------|--------------|
| -1.75      | 0          | 10.83      | 72          | -4.25         | -1.25         | 41.98     | 41.74        | 42.52     | 42.74        |
| -1         | -0.5       | 10.83      | 72          | -2.75         | -0.75         | 41.98     | 41.74        | 43.27     | 43.24        |
| -1.75      | 0          | 9.42       | 64          | -2.75         | -1.25         | 44.48     | 43.74        | 45.52     | 45.74        |
| -1.5       | 0          | 9.42       | 64          | -2            | -1            | 43.98     | 43.49        | 45.27     | 45.24        |
| -2.5       | 0          | 8.17       | 63          | -3.5          | 0             | 40.48     | 39.99        | 41.02     | 41.24        |
| -2.75      | 0          | 8.17       | 63          | -3.5          | 0             | 40.48     | 40.24        | 41.27     | 40.99        |
| -2.75      | -0.5       | 9          | 61          | -3.5          | -1            | 41.98     | 41.49        | 43.27     | 42.99        |
| -1.5       | -0.75      | 9          | 61          | -3.75         | -1.25         | 41.98     | 41.49        | 43.52     | 42.99        |
| -3.25      | 0          | 8.08       | 60          | -5.25         | -1.25         | 42.73     | 42.24        | 43.27     | 43.24        |
| -2.75      | -0.5       | 8.08       | 60          | -4.5          | -1.5          | 42.48     | 41.99        | 43.27     | 42.99        |
| -2.5       | -0.75      | 10.58      | 56          | -2.5          | -2            | 43.23     | 42.24        | 44.77     | 44.74        |
| -1.5       | -1.25      | 10.58      | 56          | -2            | -1.75         | 43.48     | 42.74        | 45.02     | 44.74        |
| -1.5       | -0.5       | 8.83       | 53          | -2.25         | -1.5          | 42.98     | 42.49        | 44.02     | 44.24        |
| -1.5       | -0.5       | 8.83       | 53          | -2.75         | -1.5          | 42.73     | 42.49        | 43.77     | 43.99        |
| -2         | 0          | 9.5        | 52          | -2.25         | -1.25         | 45.23     | 44.47        | 46.52     | 46.97        |
| -2.25      | 0          | 9.5        | 52          | -2            | -0.75         | 44.73     | 44.24        | 46.27     | 46.74        |
| -1.25      | -1         | 11.92      | 52          | -3.75         | -2            | 42.98     | 42.99        | 44.02     | 44.74        |
| -2.25      | -1.25      | 11.92      | 52          | -3.5          | -1.75         | 42.73     | 42.74        | 44.02     | 44.49        |
| -1.5       | -0.5       | 10.75      | 52          | -2            | -1.75         | 42.48     | 42.72        | 43.77     | 44.22        |
| -4         | -0.5       | 10.75      | 52          | -2            | -1            | 42.98     | 42.97        | 44.02     | 43.97        |
| -2.25      | 0          | 7.08       | 51          | -4            | -0.5          | 43.48     | 43.22        | 44.52     | 43.97        |
| -1.25      | -1.75      | 7.08       | 51          | -3            | -0.5          | 42.73     | 42.72        | 45.02     | 43.78        |
| -2         | 0          | 7.75       | 50          | -4.25         | -0.75         | 41.23     | 40.97        | 42.02     | 42.72        |
| -3.75      | -1.5       | 10.75      | 50          | -4.25         | -0.5          | 41.48     | 41.22        | 43.27     | 43.47        |
| -3.5       | 0          | 10.75      | 50          | -4            | -0.25         | 41.98     | 41.97        | 42.77     | 42.97        |
| -2         | 0          | 7.75       | 50          | -4            | -1            | 41.23     | 40.97        | 42.02     | 41.72        |
| -3.5       | -0.5       | 8.75       | 48          | -4.25         | -0.75         | 40.98     | 40.47        | 42.02     | 42.22        |
| -3.25      | -0.25      | 8.75       | 48          | -3.75         | -1.25         | 40.98     | 40.47        | 41.52     | 41.22        |
| -1.75      | -0.5       | 9.5        | 48          | -3.5          | -0.75         | 44.23     | 44.22        | 45.27     | 45.22        |
| -0.75      | -1         | 9.5        | 48          | -2.5          | -1            | 43.48     | 43.47        | 45.27     | 45.22        |

|       |       |       |    |       |       |       |       |       |       |
|-------|-------|-------|----|-------|-------|-------|-------|-------|-------|
| -1.5  | 0     | 6.17  | 46 | -3    | -1.75 | 43.48 | 42.72 | 44.52 | 44.72 |
| -1.25 | 0     | 6.17  | 46 | -2    | -1.75 | 43.23 | 42.72 | 44.27 | 44.22 |
| -1.5  | 0     | 7.17  | 45 | -3.5  | -0.75 | 43.23 | 43.22 | 44.02 | 44.72 |
| -3.25 | -0.75 | 9.33  | 45 | -2.75 | -1    | 42.47 | 42.49 | 43.68 | 43.99 |
| -3    | -0.75 | 9.33  | 45 | -2.25 | -0.5  | 42.22 | 41.99 | 43.18 | 43.24 |
| -1.5  | 0     | 7.17  | 45 | -2    | -1.25 | 43.48 | 43.47 | 44.77 | 44.97 |
| -2    | 0     | 8.67  | 45 | -4.25 | -1.25 | 42.97 | 42.99 | 43.68 | 43.74 |
| -2    | -0.5  | 8.67  | 45 | -4    | -1.5  | 43.22 | 43.24 | 44.43 | 44.49 |
| -1.75 | 0     | 8.5   | 44 | -2.5  | -1    | 40.72 | 40.49 | 41.43 | 42.49 |
| -1.75 | 0     | 8.5   | 44 | -2    | -0.75 | 40.47 | 40.49 | 41.18 | 41.74 |
| -2    | -0.5  | 7.67  | 44 | -3.75 | 0     | 42.72 | 42.74 | 43.68 | 43.74 |
| -1.75 | -0.5  | 7.67  | 44 | -3.25 | -0.75 | 41.97 | 41.99 | 43.43 | 43.49 |
| -1.25 | 0     | 8.58  | 43 | -2    | -0.75 | 41.72 | 41.49 | 42.43 | 43.49 |
| -1.5  | 0     | 8.58  | 43 | -2.5  | -1.25 | 42.22 | 41.59 | 42.93 | 43.39 |
| -2    | 0     | 7.92  | 43 | -2.75 | 0     | 43.47 | 43.24 | 43.93 | 44.24 |
| -2.25 | 0     | 7.92  | 43 | -2.5  | -0.5  | 43.97 | 43.49 | 44.68 | 44.74 |
| -1.75 | -0.75 | 13.92 | 43 | -5.25 | -1    | 43.72 | 43.74 | 44.68 | 44.99 |
| -4.75 | -0.5  | 13.92 | 43 | -4    | -1    | 43.47 | 43.49 | 45.18 | 44.74 |
| -2    | -0.5  | 8.25  | 39 | -3.25 | -1.5  | 43.72 | 43.49 | 45.18 | 45.49 |
| -1.75 | -0.75 | 8.25  | 39 | -3    | -1.5  | 43.97 | 43.74 | 45.43 | 45.49 |
| -1    | -0.5  | 11.25 | 39 | -1.75 | 0     | 43.47 | 43.49 | 44.93 | 44.74 |
| -0.75 | -0.5  | 11.25 | 39 | -1.5  | -0.5  | 43.72 | 43.69 | 45.18 | 44.94 |
| -2.5  | -0.5  | 8.5   | 38 | -3.75 | -0.25 | 42.22 | 41.94 | 43.18 | 42.94 |
| -2.5  | 0     | 8.5   | 38 | -4    | -0.75 | 41.97 | 42.19 | 43.18 | 42.94 |
| -2.25 | 0     | 6.92  | 37 | -3.25 | -1.25 | 42.97 | 42.69 | 43.18 | 43.69 |
| -2    | 0     | 9.42  | 37 | -3.25 | -1    | 42.47 | 41.94 | 43.68 | 43.69 |
| -2    | 0     | 9.42  | 37 | -3.5  | -0.5  | 42.47 | 42.19 | 43.43 | 43.69 |
| -1.5  | -0.5  | 7.17  | 37 | -3.75 | -0.5  | 42.22 | 41.69 | 43.43 | 43.44 |
| -2.25 | 0     | 11.17 | 37 | -2.75 | -0.75 | 42.47 | 42.44 | 43.18 | 43.69 |
| -2.5  | -1.25 | 11.17 | 37 | -2.5  | -0.5  | 42.47 | 42.44 | 43.43 | 43.94 |
| -2    | 0     | 6.92  | 37 | -2.75 | -1    | 42.97 | 42.69 | 43.43 | 43.44 |

|       |       |       |    |       |       |       |       |       |       |
|-------|-------|-------|----|-------|-------|-------|-------|-------|-------|
| -2.5  | -0.5  | 7.17  | 37 | -2.75 | -1.5  | 41.97 | 41.69 | 43.18 | 43.19 |
| -3.5  | 0     | 8.33  | 36 | -4    | 0     | 43.72 | 43.44 | 45.43 | 44.69 |
| -3.75 | -0.5  | 8.33  | 36 | -3.75 | -0.5  | 43.47 | 43.19 | 45.43 | 44.44 |
| -3.25 | -0.25 | 7.25  | 35 | -4.25 | -0.5  | 43.47 | 42.84 | 44.18 | 44.04 |
| -3.25 | 0     | 7.25  | 35 | -4    | 0     | 43.22 | 42.64 | 43.93 | 43.74 |
| -3    | 0     | 9     | 35 | -3    | -0.5  | 43.52 | 43.54 | 44.04 | 44.04 |
| -2    | 0     | 9     | 35 | -2    | -0.75 | 42.77 | 42.79 | 43.54 | 43.54 |
| -1.5  | 0     | 8.17  | 35 | -3.5  | -0.75 | 44.47 | 44.44 | 45.68 | 45.44 |
| -3    | -0.75 | 12.5  | 35 | -3.5  | -1.25 | 44.27 | 44.05 | 46.04 | 45.55 |
| -2.75 | -1    | 8.5   | 35 | -5    | -0.5  | 44.52 | 44.29 | 46.29 | 45.79 |
| -1.75 | 0     | 8.17  | 35 | -4    | -1    | 44.47 | 44.44 | 45.93 | 45.44 |
| -4    | 0     | 10.67 | 33 | -4    | -0.5  | 41.77 | 41.29 | 42.79 | 42.79 |
| -2.75 | 0     | 7.42  | 33 | -3.25 | -1    | 43.77 | 43.54 | 45.04 | 45.04 |
| -3.25 | 0     | 10.67 | 33 | -3.25 | -0.5  | 42.02 | 41.79 | 43.04 | 43.04 |
| -2.5  | 0     | 7.42  | 33 | -4    | -0.75 | 43.77 | 43.54 | 45.04 | 44.79 |
| -3.25 | -0.5  | 11    | 32 | -5    | -0.75 | 43.52 | 43.29 | 44.79 | 45.04 |
| -4    | -1    | 11    | 32 | -5    | -1    | 42.77 | 42.54 | 44.29 | 43.54 |
| -2.5  | 0     | 10.5  | 31 | -4.5  | -0.5  | 43.52 | 43.79 | 44.79 | 45.04 |
| -3    | -0.5  | 10.5  | 31 | -4.5  | -0.75 | 43.52 | 43.54 | 45.29 | 45.29 |
| -3.5  | -0.75 | 7.83  | 30 | -5    | -0.75 | 42.52 | 42.54 | 44.29 | 44.54 |
| -4.25 | 0     | 10.25 | 30 | -5    | -1.25 | 43.27 | 43.29 | 44.54 | 44.54 |
| -4.5  | -0.5  | 10.25 | 30 | -4.5  | -1    | 43.27 | 43.29 | 45.04 | 44.79 |
| -3.5  | -1    | 7.83  | 30 | -4.5  | -1    | 42.52 | 42.79 | 44.54 | 44.54 |
| -3.25 | 0     | 11.92 | 29 | -5.25 | -0.5  | 42.27 | 41.79 | 43.29 | 43.54 |
| -4.5  | -0.5  | 9.75  | 29 | -5.25 | -0.5  | 42.27 | 42.29 | 43.79 | 44.04 |
| -3.5  | 0     | 11.92 | 29 | -3.75 | -0.5  | 42.77 | 42.54 | 43.54 | 43.54 |
| -3.25 | -0.5  | 9.75  | 29 | -3.25 | -1    | 41.52 | 41.5  | 42.79 | 43    |
| -4.75 | -0.75 | 10.83 | 29 | -2    | -0.75 | 44.77 | 44.75 | 45.79 | 46    |
| -4.75 | -0.5  | 9.75  | 29 | -4.25 | -1    | 42.27 | 42.04 | 44.04 | 43.79 |
| -1.5  | -0.5  | 9.75  | 29 | -4.5  | -0.75 | 41.27 | 41.25 | 42.79 | 42.75 |
| -4.75 | -1    | 10.83 | 29 | -4.75 | -1    | 44.27 | 44.75 | 45.79 | 46    |

|       |       |       |    |       |       |       |       |       |       |
|-------|-------|-------|----|-------|-------|-------|-------|-------|-------|
| -1.5  | 0     | 8.58  | 28 | -1.75 | -0.5  | 43.77 | 42.98 | 44.54 | 45.25 |
| -1    | -0.75 | 7.42  | 28 | -2.25 | -0.5  | 43.27 | 42.75 | 45.04 | 45    |
| -1.25 | 0     | 8.08  | 28 | -1.5  | -2    | 42.27 | 41.8  | 43.04 | 42.9  |
| -2    | 0     | 8.08  | 28 | -1.5  | -1.75 | 42.27 | 41.9  | 43.29 | 43.2  |
| -2.25 | -0.5  | 7.42  | 28 | -4.5  | -0.25 | 43.27 | 43    | 45.04 | 45    |
| -2    | 0     | 8.58  | 28 | -3.25 | -0.75 | 43.77 | 43.5  | 44.54 | 44.25 |
| -1.25 | -0.25 | 10.42 | 28 | -1.75 | -1.25 | 43.27 | 43.25 | 45.04 | 45    |
| -1.5  | -0.25 | 10.42 | 28 | -1.25 | -1    | 43.52 | 43.5  | 44.79 | 44.75 |
| -1.25 | -0.75 | 9.33  | 27 | -4.25 | -1    | 44.53 | 44.01 | 45.55 | 46.01 |
| -2    | 0     | 7.67  | 27 | -3.25 | -1    | 41.77 | 41.5  | 43.04 | 43.25 |
| -1    | 0     | 7.83  | 27 | -3    | -0.5  | 42.02 | 42    | 42.54 | 43    |
| -1.25 | 0     | 7.83  | 27 | -3.25 | -0.5  | 42.03 | 42.26 | 42.55 | 43.26 |
| -2    | 0     | 9.33  | 27 | -3.25 | 0     | 45.03 | 45.01 | 45.8  | 46.26 |
| -3    | -0.75 | 10.5  | 27 | -2    | -1    | 43.03 | 43.04 | 44.26 | 44.54 |
| -3    | -0.5  | 10.5  | 27 | -3.5  | -1    | 43.53 | 43.29 | 44.51 | 44.54 |
| -2.75 | 0     | 7.67  | 27 | -3.75 | -0.75 | 41.77 | 41.75 | 43.04 | 43.25 |
| -4.5  | -0.5  | 11.08 | 26 | -4.5  | -1.5  | 43.53 | 42.44 | 45.01 | 45.04 |
| -3.75 | 0.75  | 7.75  | 26 | -4.5  | -1.5  | 43.53 | 42.84 | 45.01 | 45.24 |
| -3    | 0     | 7.75  | 26 | -4.5  | -0.5  | 42.53 | 42.29 | 44.01 | 44.04 |
| -4.75 | -0.75 | 9.08  | 26 | -4.5  | -1.25 | 42.03 | 42.04 | 43.01 | 43.04 |
| -4.75 | -1    | 9.08  | 26 | -4    | 0     | 44.03 | 44.04 | 45.51 | 45.54 |
| -4.25 | -0.75 | 11.08 | 26 | -3.75 | -0.5  | 43.03 | 43.04 | 44.76 | 44.54 |
| -3.25 | 0     | 7.75  | 26 | -5    | 0     | 42.28 | 42.29 | 43.01 | 42.79 |
| -4    | -0.5  | 9.1   | 26 | -5    | 0     | 41.78 | 41.77 | 43.26 | 43.02 |
| -3.75 | 0     | 10    | 25 | -3.5  | -0.75 | 41.28 | 41.04 | 41.76 | 42.29 |
| -2.75 | 0     | 8.67  | 25 | -3    | -0.75 | 43.28 | 43.04 | 44.76 | 44.79 |
| -4    | 0     | 11    | 25 | -1    | -1.25 | 41.28 | 41.29 | 42.01 | 42.29 |
| -2    | 0     | 8.67  | 25 | -3.25 | -0.75 | 44.03 | 44.04 | 45.76 | 45.79 |
| -1    | 0     | 10    | 25 | -4.25 | -1    | 43.53 | 43.54 | 45.01 | 45.04 |
| -3.75 | 0     | 11    | 25 | -4.25 | -1.25 | 43.28 | 43.04 | 44.76 | 44.54 |
| -2.5  | 0     | 7.92  | 24 | -3.75 | -1.75 | 42.28 | 41.52 | 43.26 | 43.52 |

|       |       |       |    |       |       |       |       |       |       |
|-------|-------|-------|----|-------|-------|-------|-------|-------|-------|
| -3.25 | -0.75 | 8.5   | 24 | -4.5  | -1.25 | 43.28 | 42.77 | 44.26 | 44.52 |
| -4.75 | 0     | 10.83 | 24 | -1.5  | 0.5   | 42.78 | 42.27 | 44.01 | 44.27 |
| -1.25 | 0     | 6.92  | 24 | -3    | -0.25 | 43.53 | 43.27 | 44.51 | 44.77 |
| -3.5  | 0     | 6.83  | 24 | -3.5  | -2    | 42.28 | 41.77 | 43.51 | 43.52 |
| -2    | -0.75 | 9.42  | 24 | -3    | -1.25 | 43.03 | 42.27 | 44.51 | 44.27 |
| -4.75 | 0     | 10.83 | 24 | -2.5  | -1    | 42.28 | 42.02 | 43.26 | 43.52 |
| -1.5  | 0     | 6.92  | 24 | -2.25 | -1    | 42.28 | 41.82 | 43.01 | 42.92 |
| -2.75 | 0     | 6.83  | 24 | -2    | -0.75 | 42.28 | 42.12 | 42.51 | 42.62 |
| -1.5  | 0     | 8.08  | 24 | -2.25 | -0.5  | 41.53 | 41.52 | 42.76 | 43.02 |
| -2    | 0     | 9.42  | 24 | -3    | -1.5  | 41.53 | 41.52 | 42.76 | 43.02 |
| -3.25 | -0.5  | 8.5   | 24 | -3.25 | -1.5  | 43.28 | 43.04 | 45.01 | 44.79 |
| -2    | 0     | 7.92  | 24 | -5.25 | -0.75 | 43.28 | 43.27 | 44.26 | 44.27 |
| -1.25 | 0     | 8.08  | 24 | -5.5  | -0.75 | 43.03 | 43.02 | 43.76 | 43.77 |
